# Supplementary material
Source: MDPI journal article supplement (https://www.mdpi.com/2077-1312/12/3/504)
Supplement: s1 [file s1]

Supplementary Materials

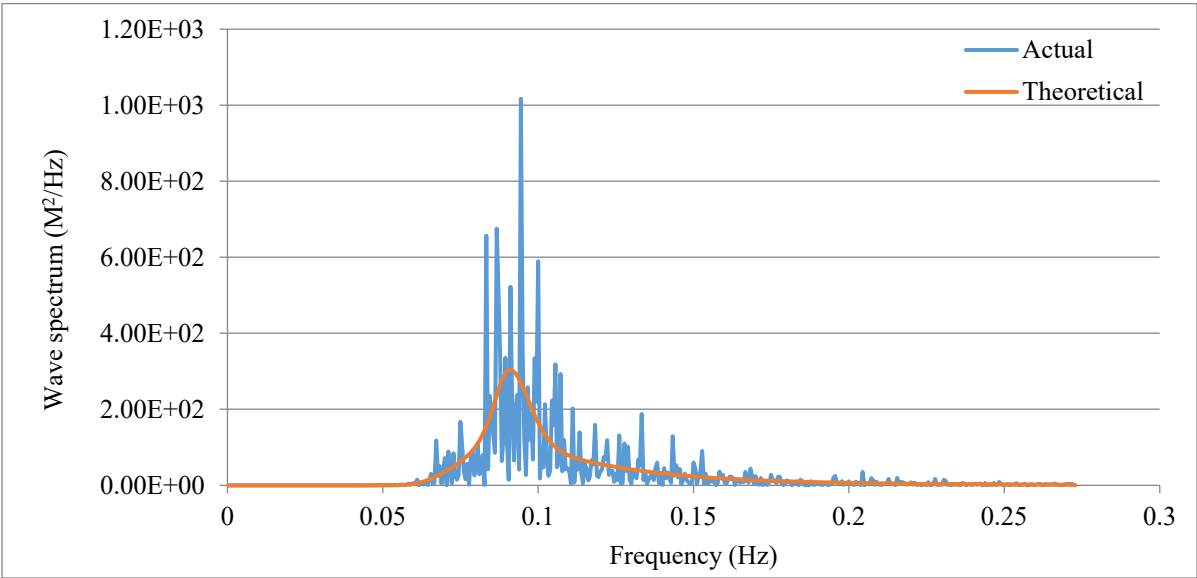

Figure S1. Comparison of the wave spectrum of the actual and theoretical one.

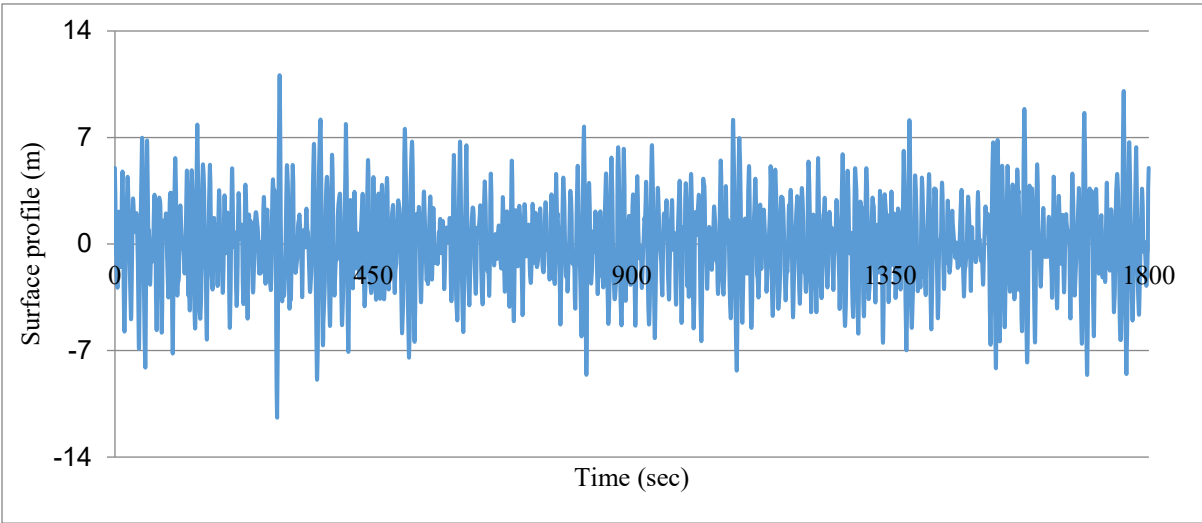

Figure S2. The time history of the water surface elevation due to wave.

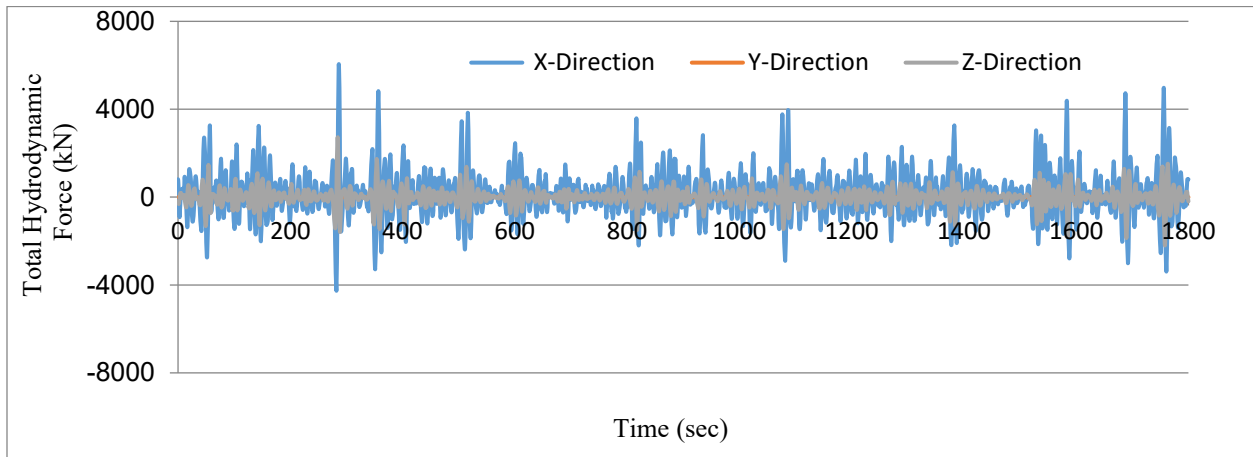

**Figure S3.** The time history of total hydrodynamic force in different directions.

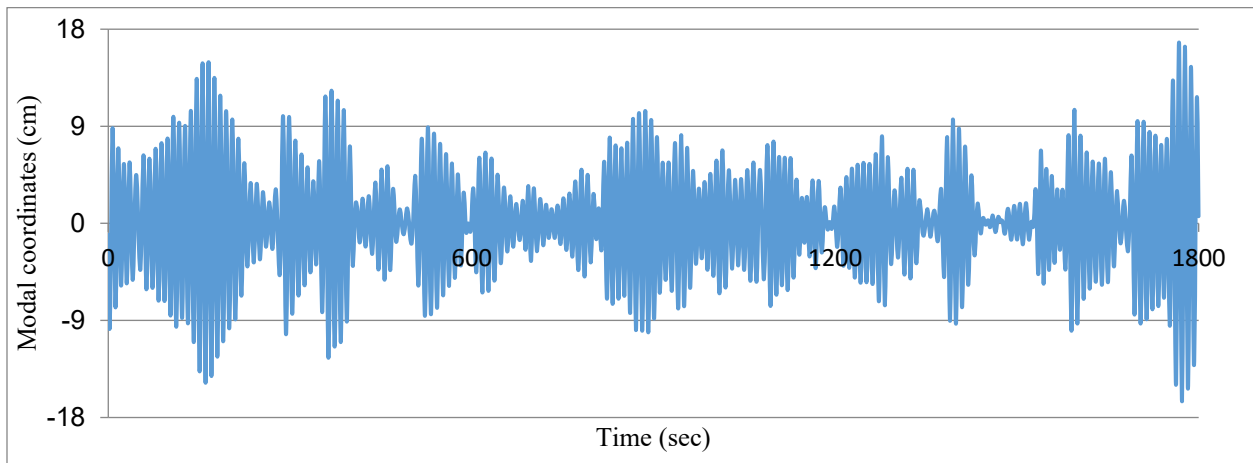

**Figure S4.** The time history of Modal coordinates.

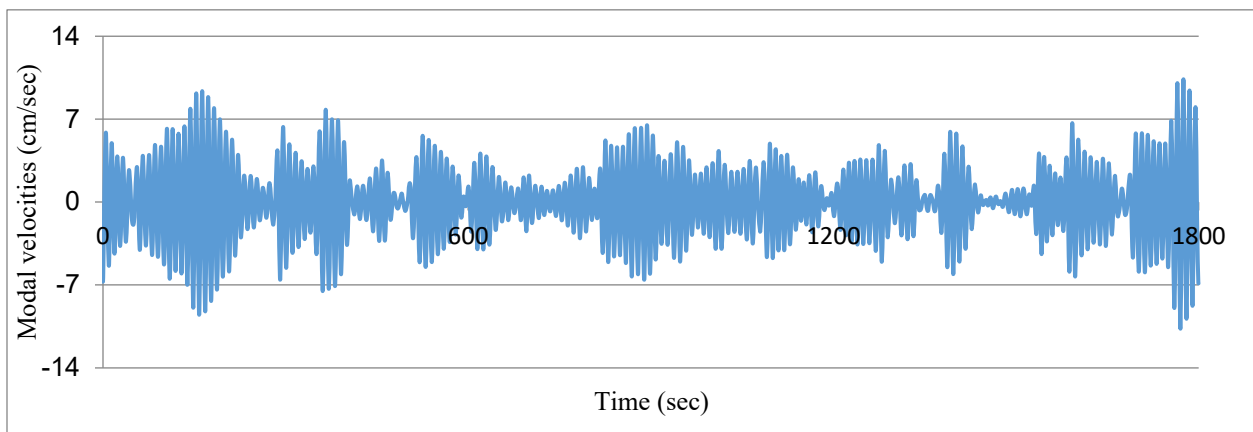

**Figure S5.** The time history of Modal velocities.

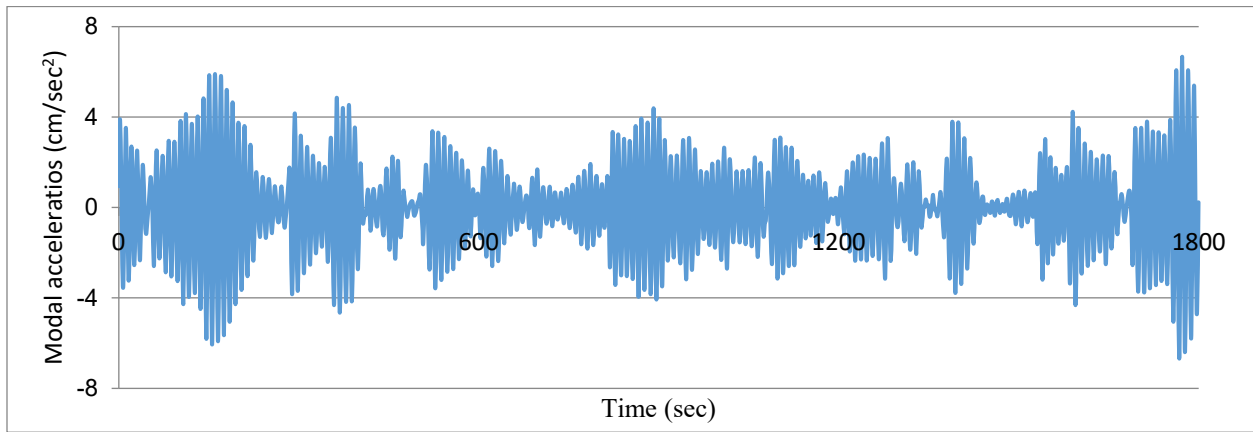

**Figure S6.** The time history of Modal accelerations.

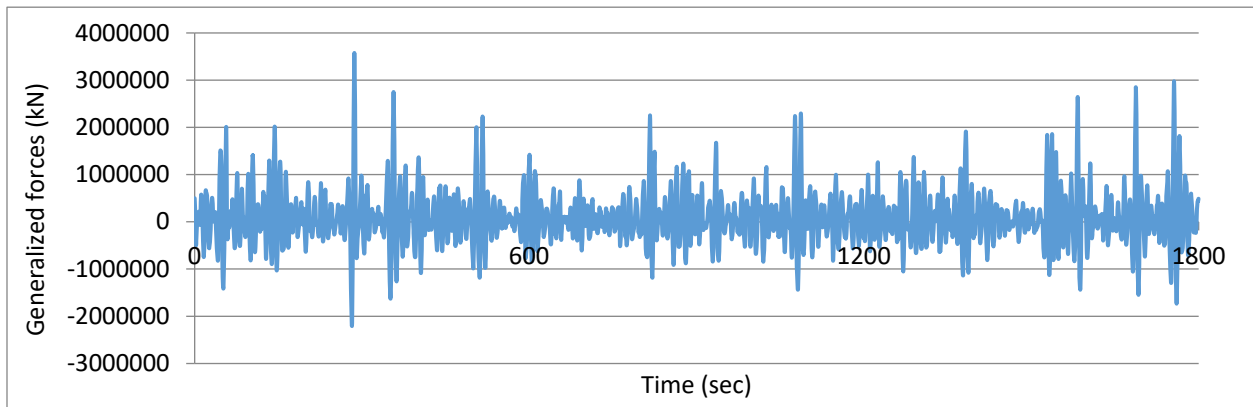

**Figure S7.** The time history of generalized forces.

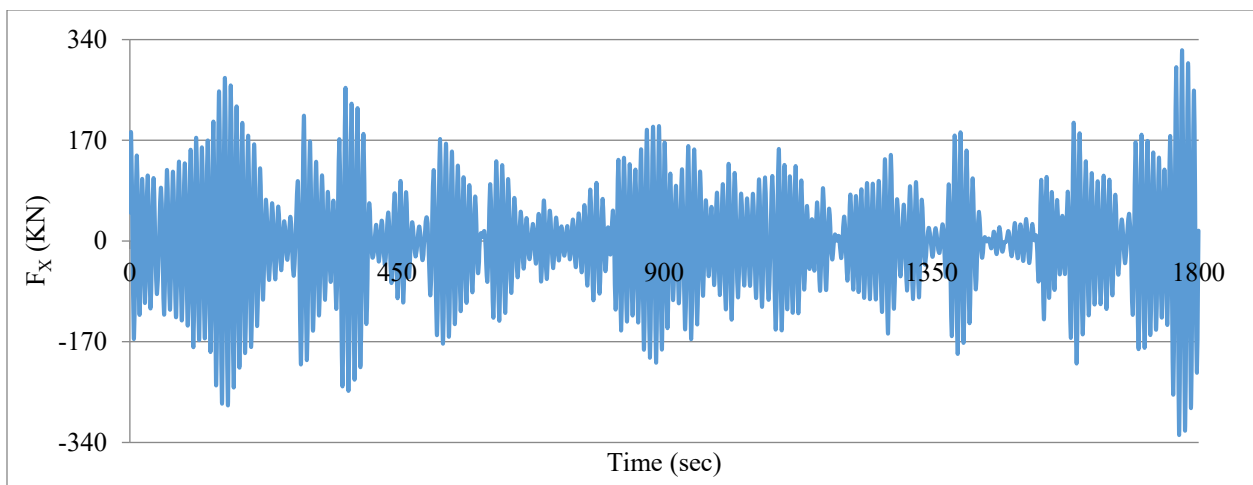

**Figure S8.** The time history of  $F_x$  for Element 5.

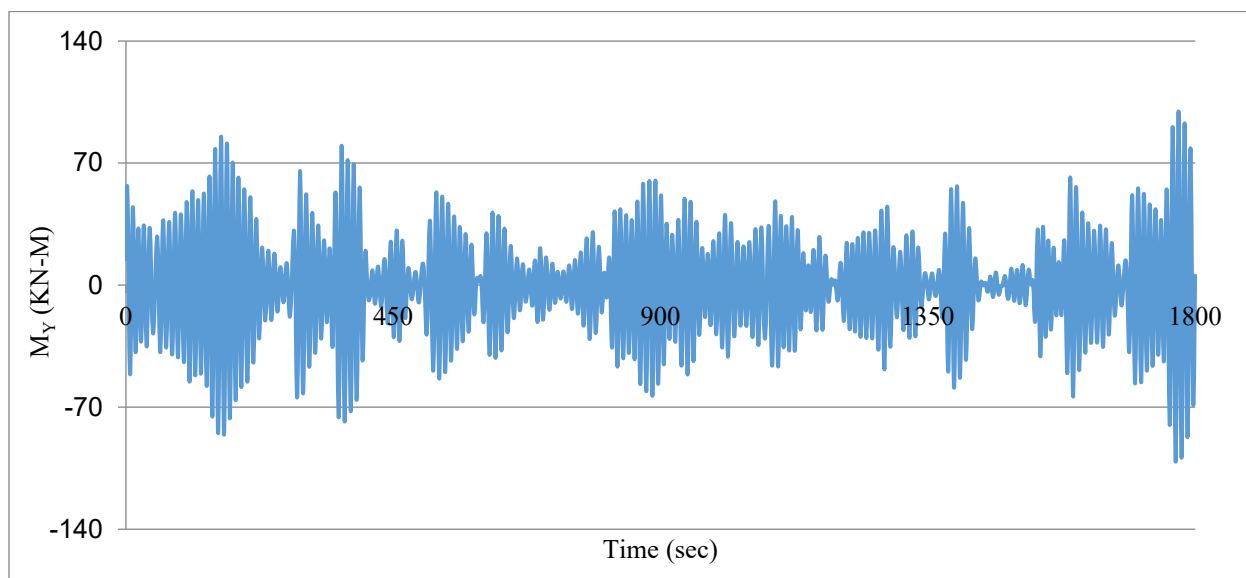

**Figure S9.** The time history of  $M_Y$  for Element 5.

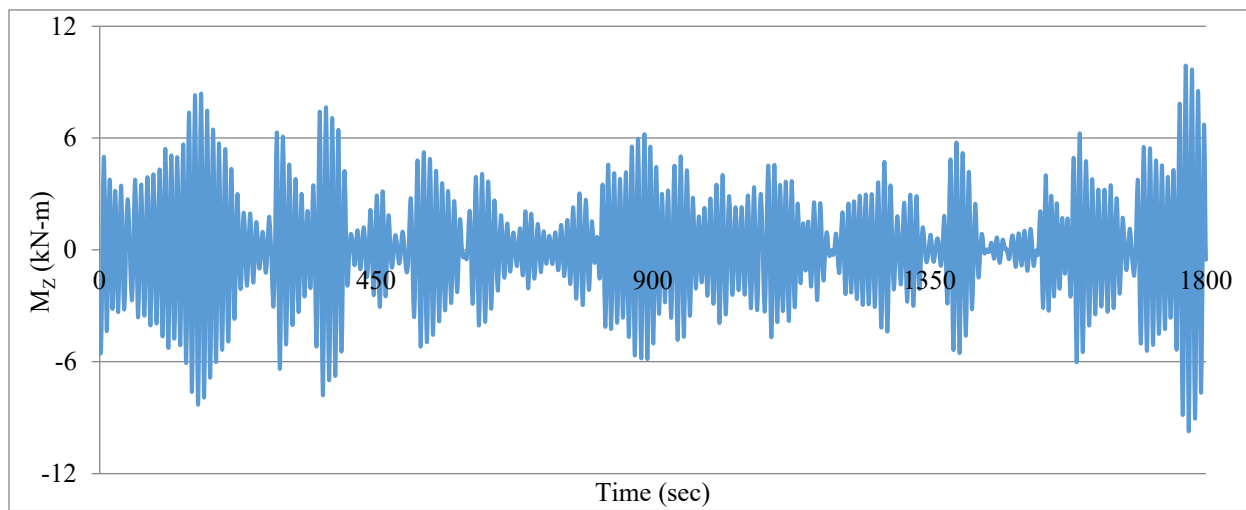

**Figure S10.** The time history of  $M_Z$  for Element 5.

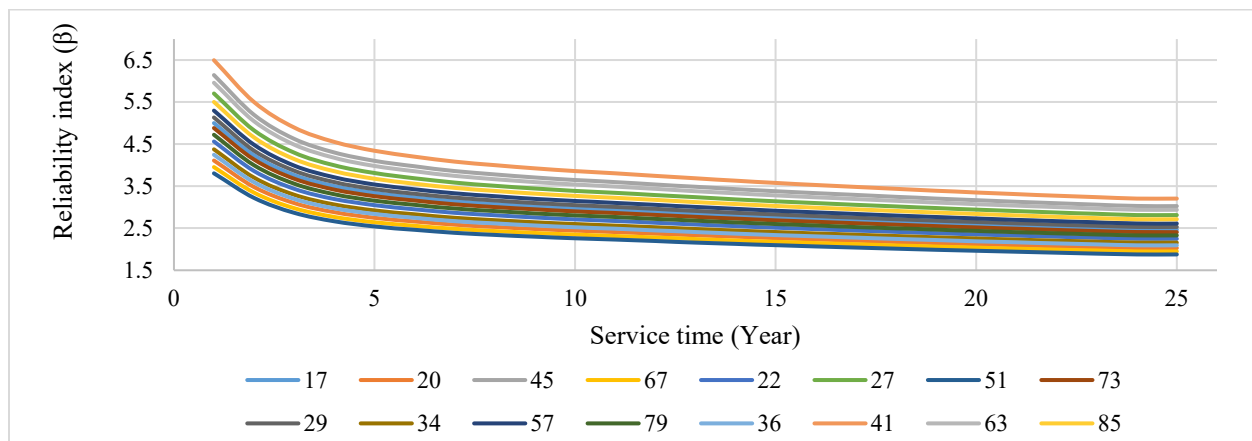

**Figure S11.** Comparison of variation of reliability index ( $\beta$ ) of structural tubular elements over service time (T) for the submerged zone (Leg elements).

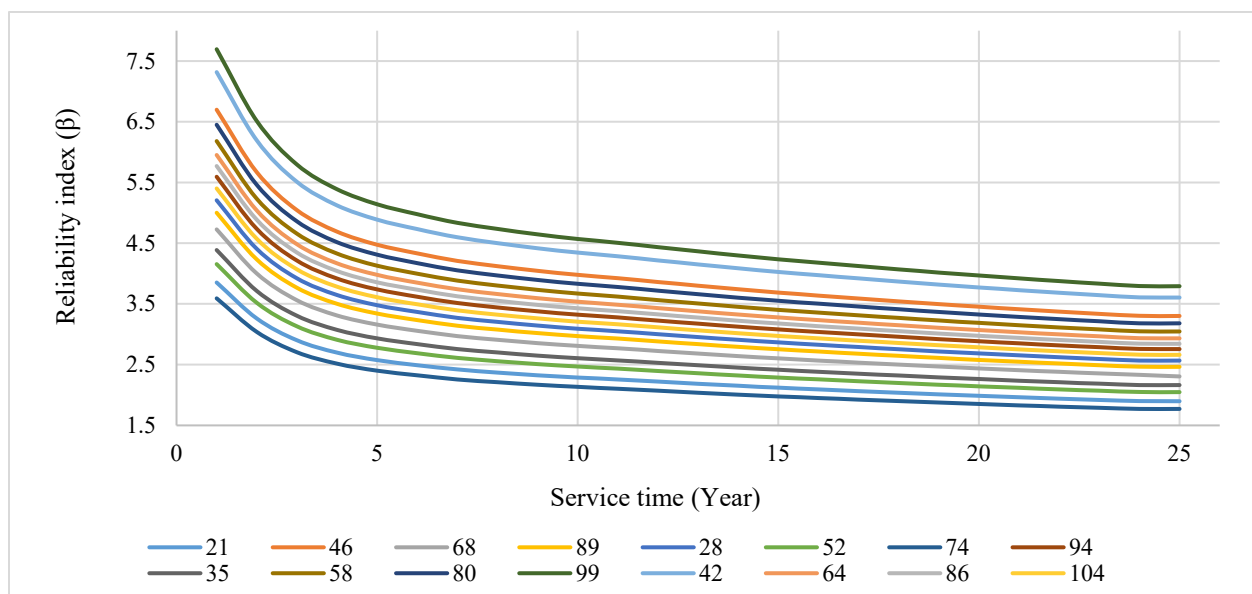

**Figure S12.** Comparison of variation of reliability index ( $\beta$ ) of structural tubular elements over service time (T) for the submerged zone (Horizontal bracing elements).

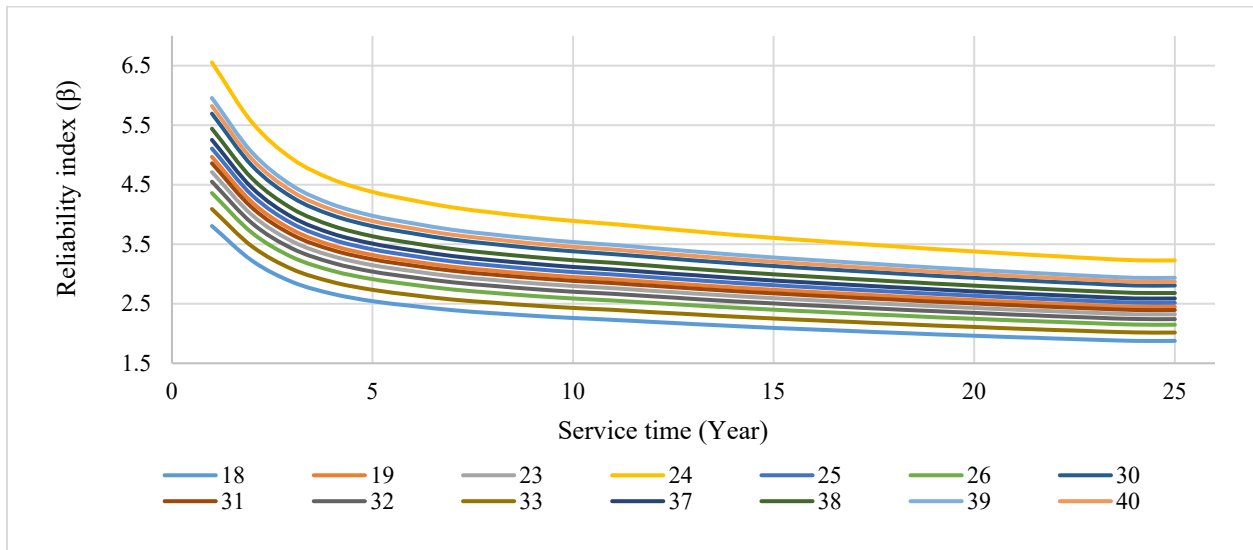

**Figure S13.** Comparison of variation of reliability index ( $\beta$ ) of structural tubular elements over service time (T) for the submerged zone (Vertical bracing elements); ROW-2.

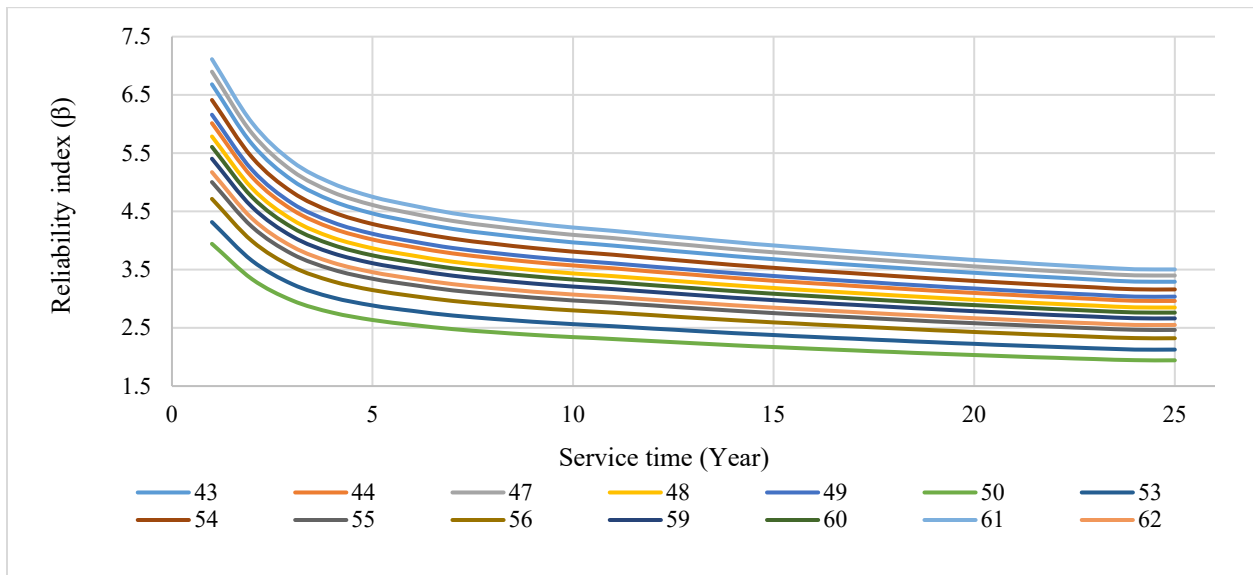

**Figure S14.** Comparison of variation of reliability index ( $\beta$ ) of structural tubular elements over service time (T) for the submerged zone (Vertical bracing elements); ROW-B.

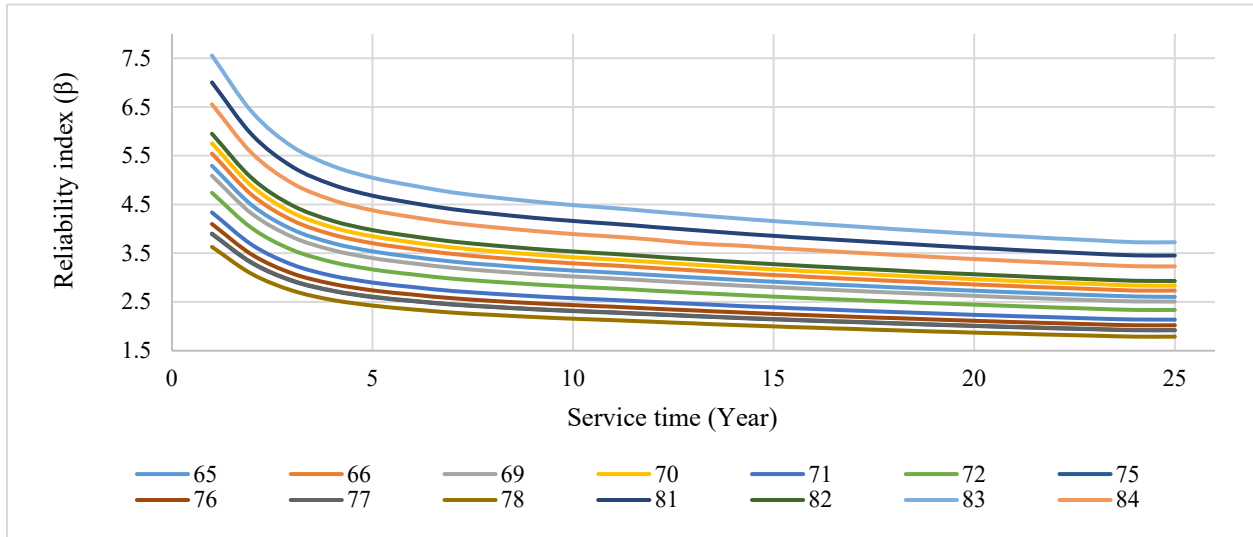

**Figure S15.** Comparison of variation of reliability index ( $\beta$ ) of structural tubular elements over service time (T) for the submerged zone (Vertical bracing elements); ROW-1.

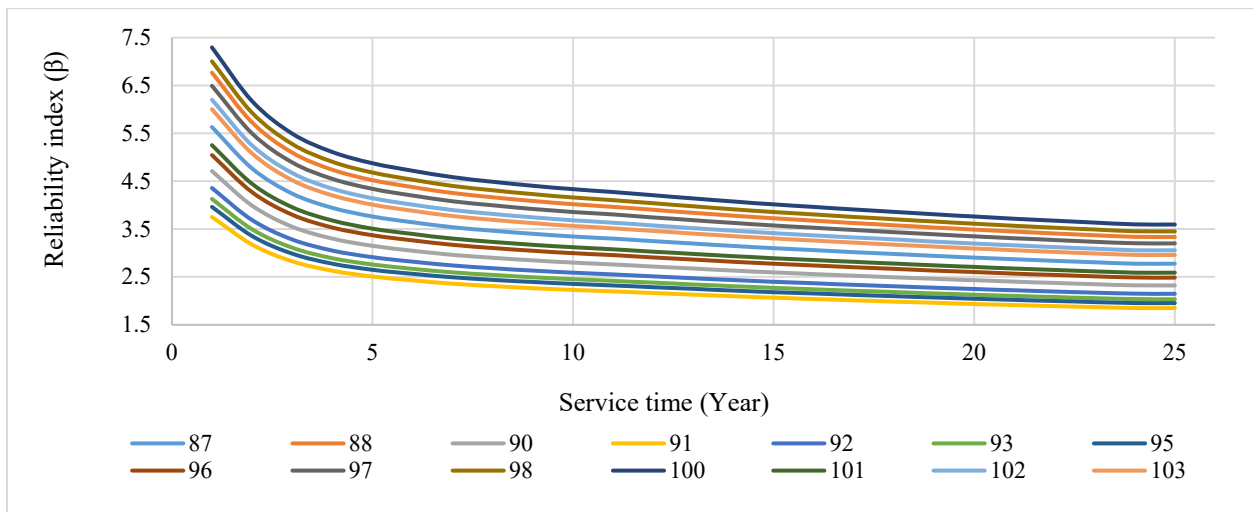

**Figure S16.** Comparison of variation of reliability index ( $\beta$ ) of structural tubular elements over service time (T) for the submerged zone (Vertical bracing elements); ROW-A.

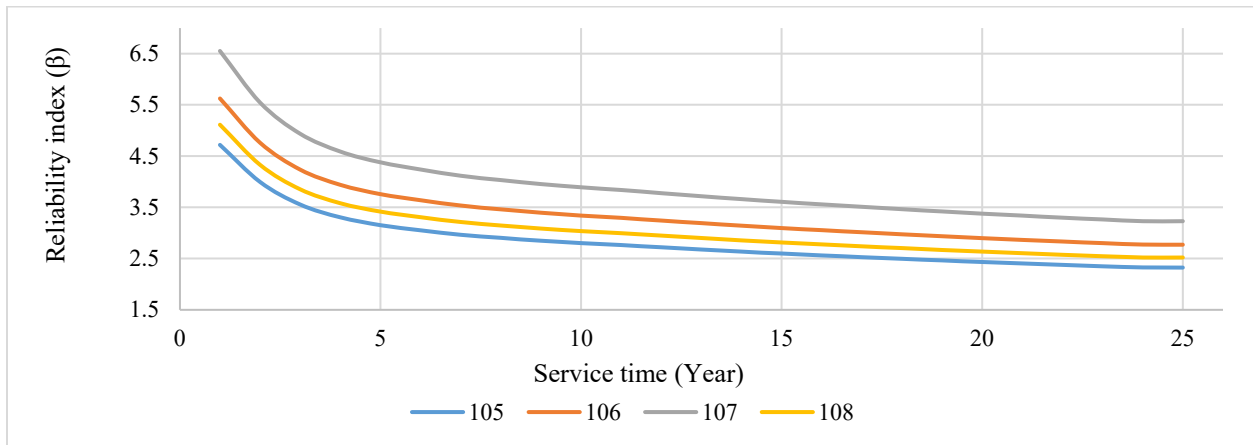

**Figure S17.** Comparison of variation of reliability index ( $\beta$ ) of structural tubular elements over service time (T) for soil zone (Leg elements).

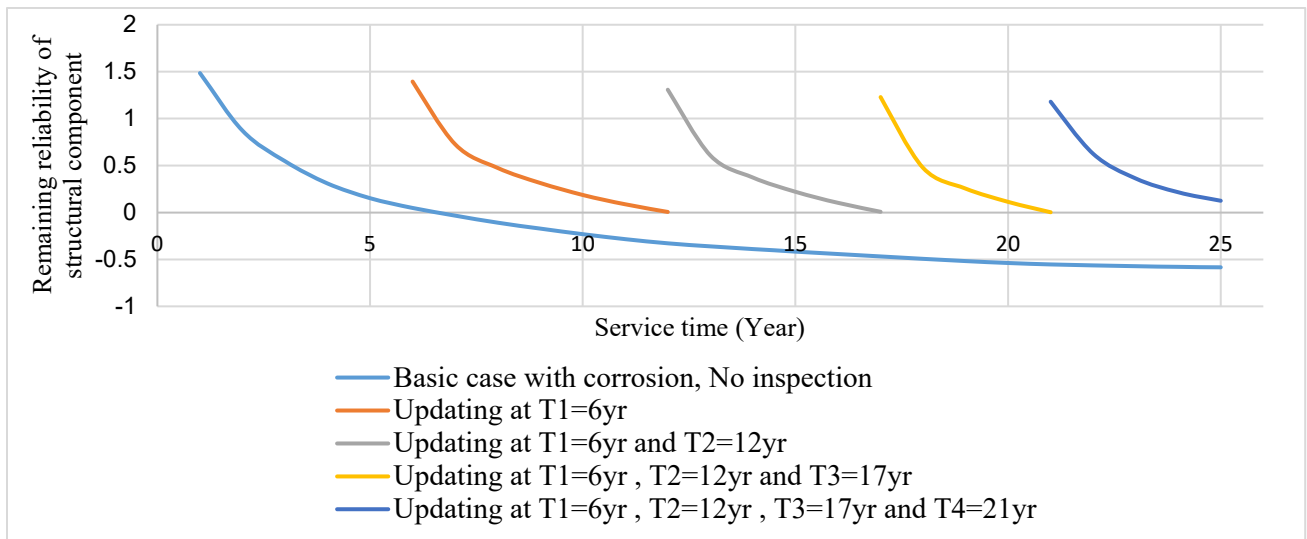

**Figure S18.** Effect of inspection updating on remaining reliability of tubular element ( $R_{rem}$ ) over service time (T) for splash zone (Element 3).

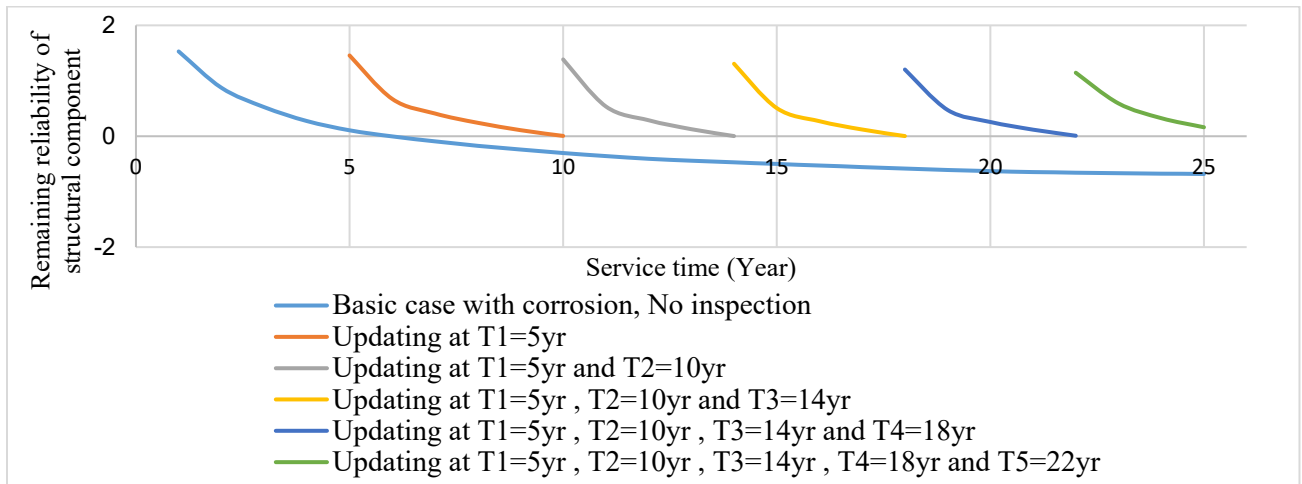

**Figure S19.** Effect of inspection updating on remaining reliability of tubular element ( $R_{rem}$ ) over service time (T) for splash zone (Element 4).

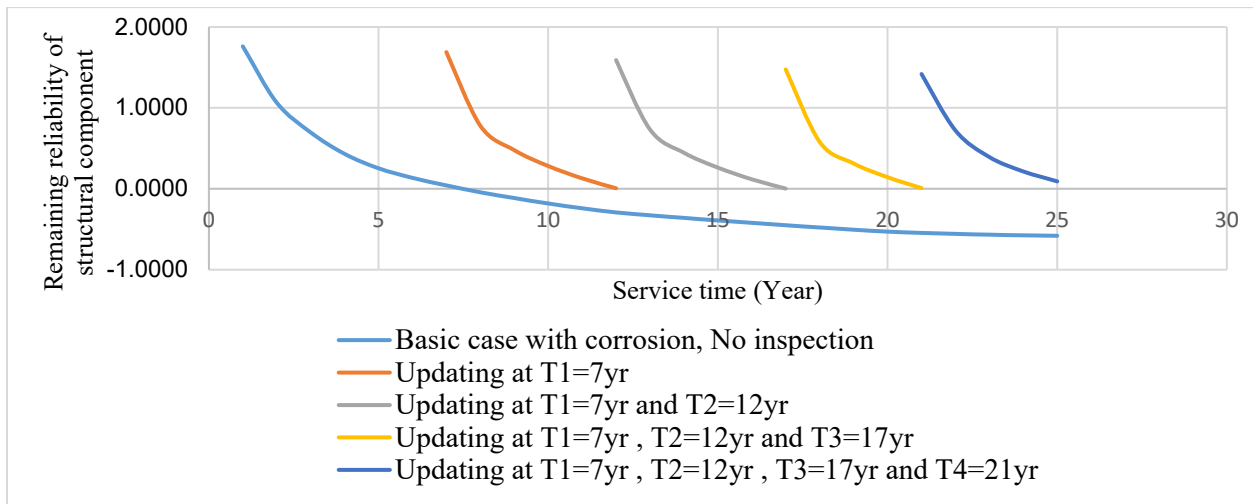

**Figure S20.** Effect of inspection updating on remaining reliability of tubular element ( $R_{rem}$ ) over service time (T) for splash zone (Element 6).

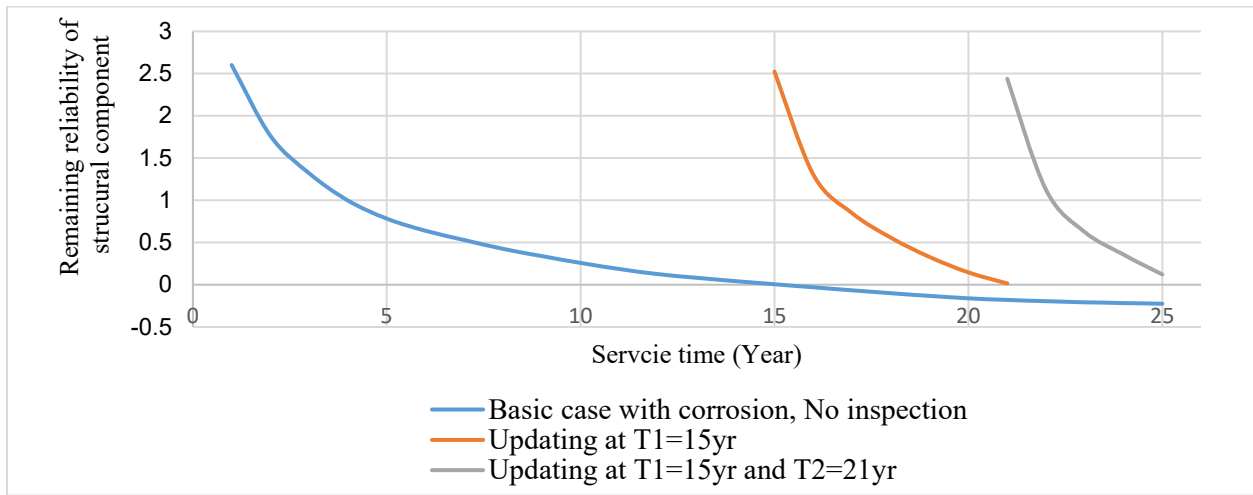

**Figure S21.** Effect of inspection updating on remaining reliability of tubular element ( $R_{rem}$ ) over service time (T) for splash zone (Element 8).

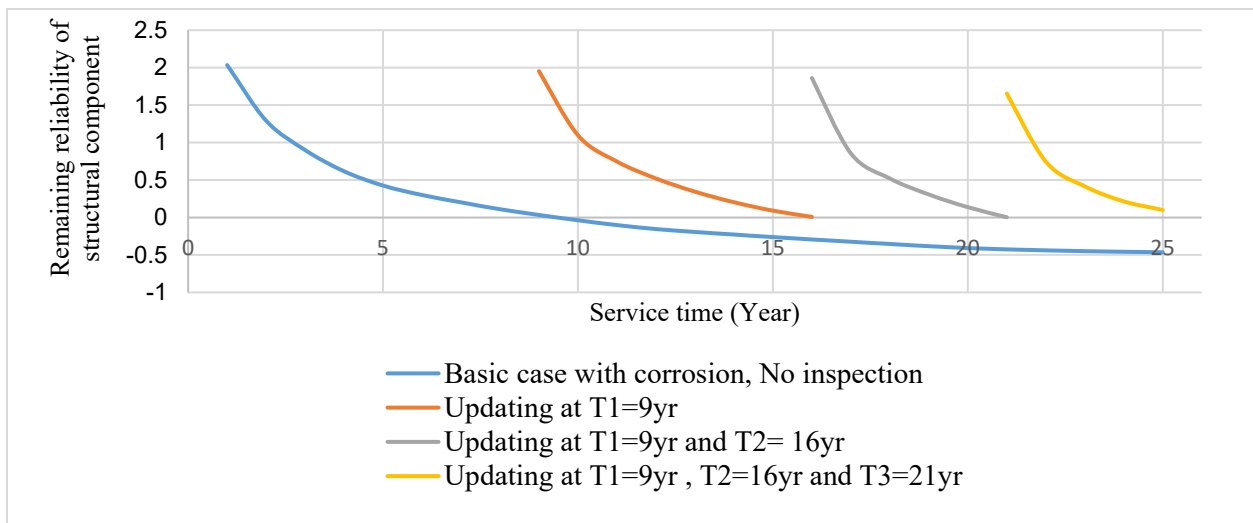

**Figure S22.** Effect of inspection updating on remaining reliability of tubular element ( $R_{rem}$ ) over service time (T) for splash zone (Element 9).

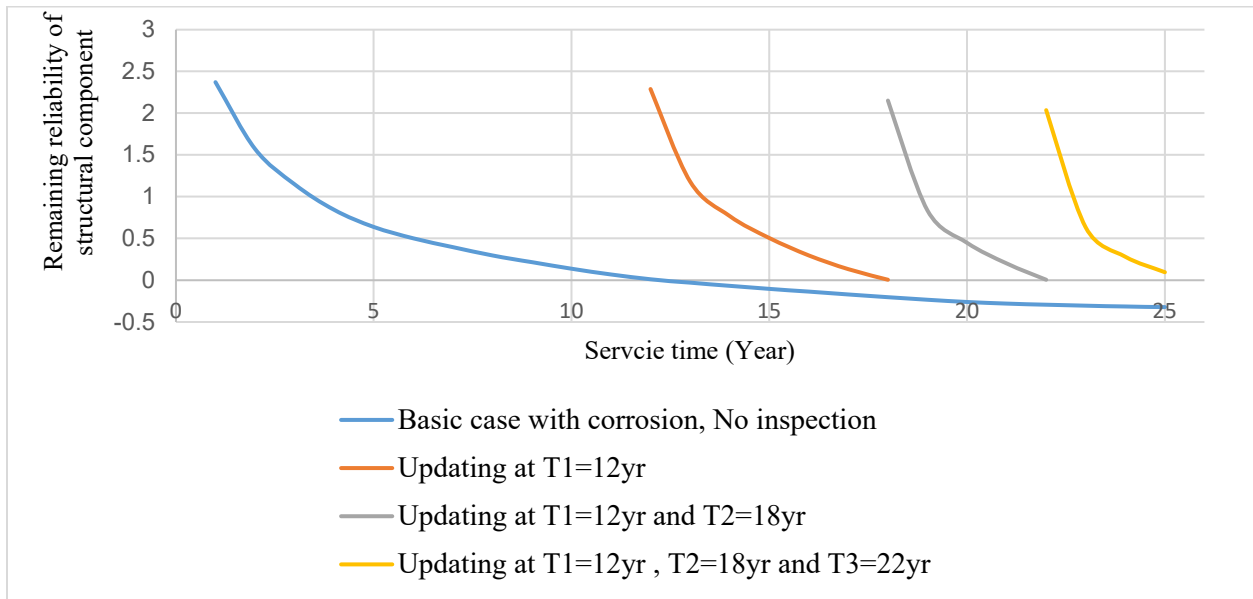

**Figure S23.** Effect of inspection updating on remaining reliability of tubular element ( $R_{rem}$ ) over service time (T) for splash zone (Element 10).

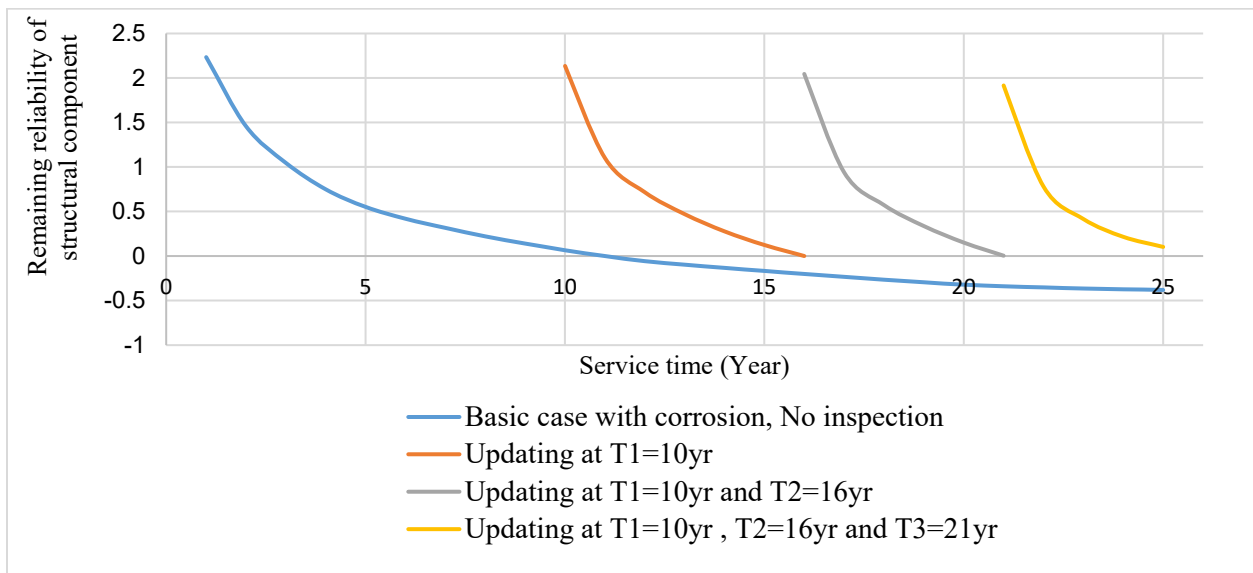

**Figure S24.** Effect of inspection updating on remaining reliability of tubular element ( $R_{rem}$ ) over service time (T) for splash zone (Element 11).

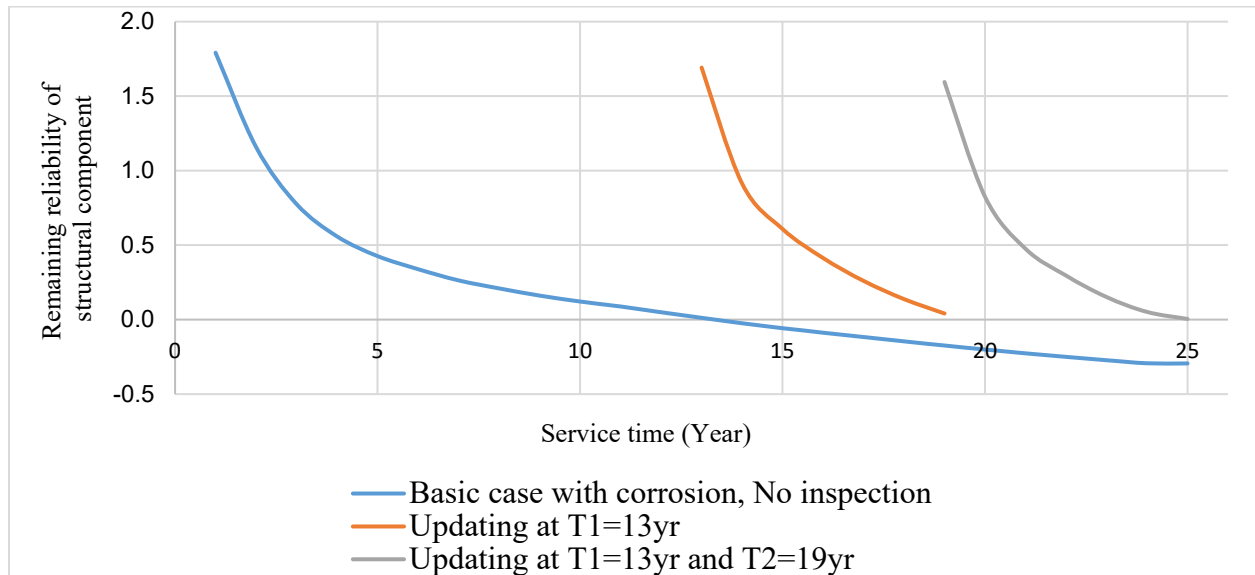

**Figure S25.** Effect of inspection updating on remaining reliability of tubular element ( $R_{rem}$ ) over service time (T) for the submerged zone (Element 20).

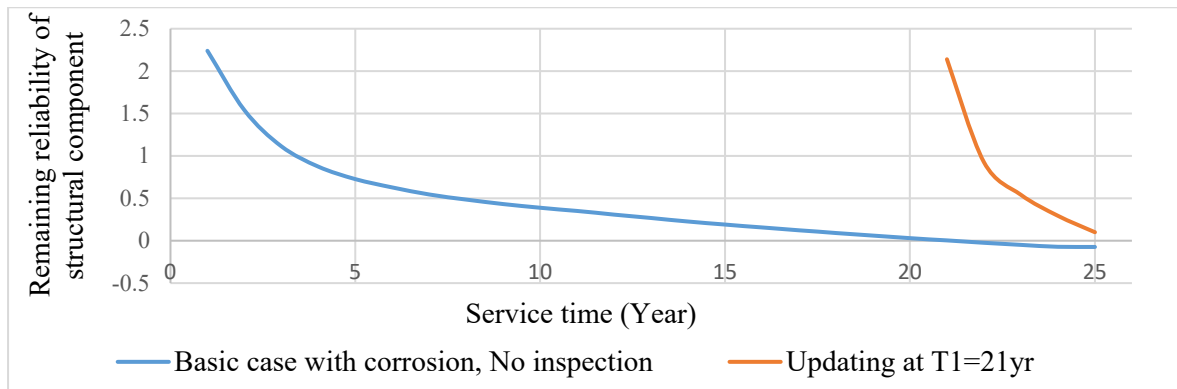

**Figure S26.** Effect of inspection updating on remaining reliability of tubular element ( $R_{rem}$ ) over service time (T) for the submerged zone (Element 22).

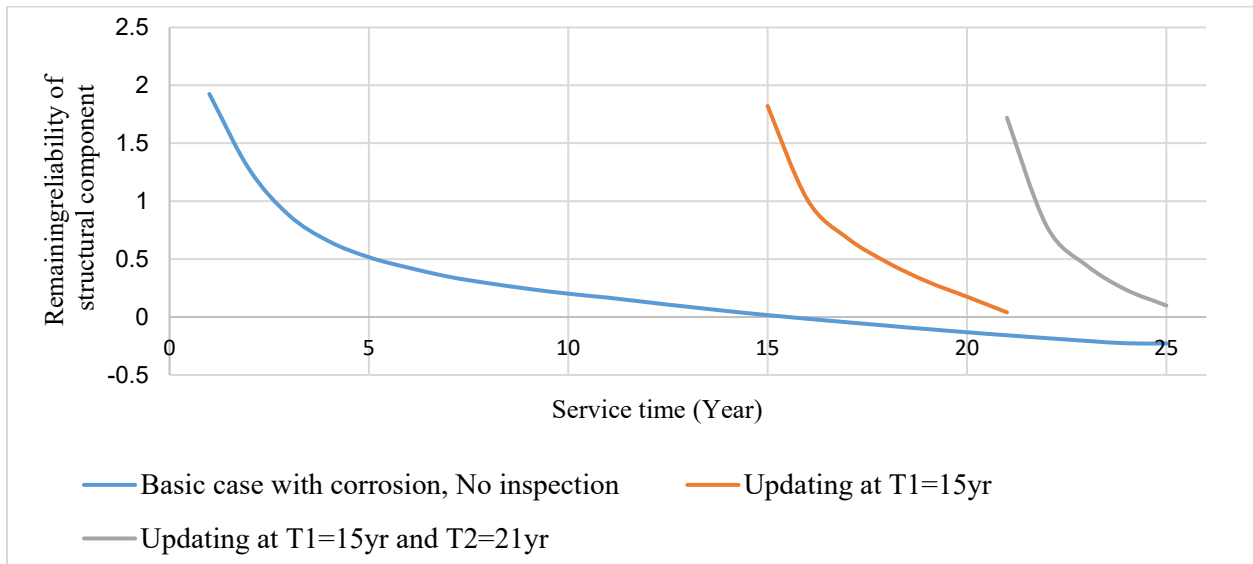

**Figure S27.** Effect of inspection updating on remaining reliability of tubular element ( $R_{rem}$ ) over service time (T) for the submerged zone (Element 34).

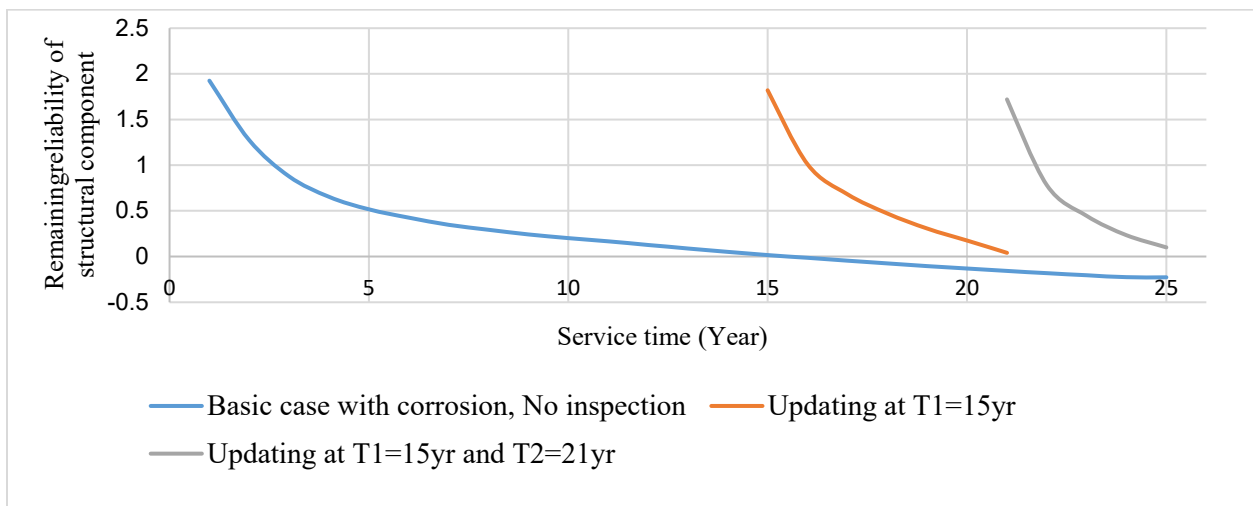

**Figure S28.** Effect of inspection updating on remaining reliability of tubular element ( $R_{rem}$ ) over service time (T) for the submerged zone (Element 36).

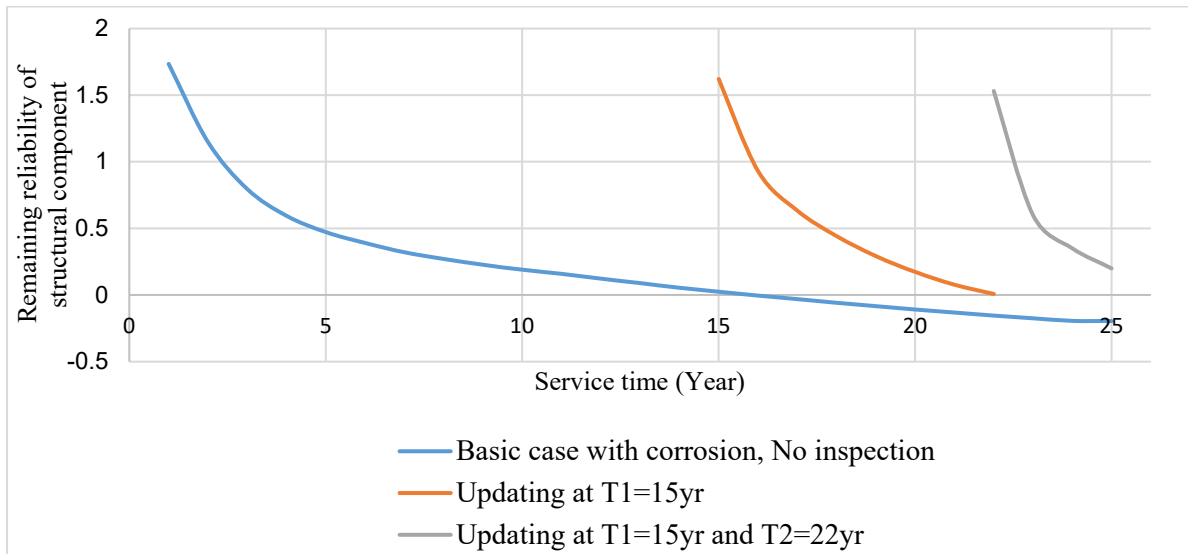

**Figure S29.** Effect of inspection updating on remaining reliability of tubular element ( $R_{rem}$ ) over service time (T) for the submerged zone (Element 51).

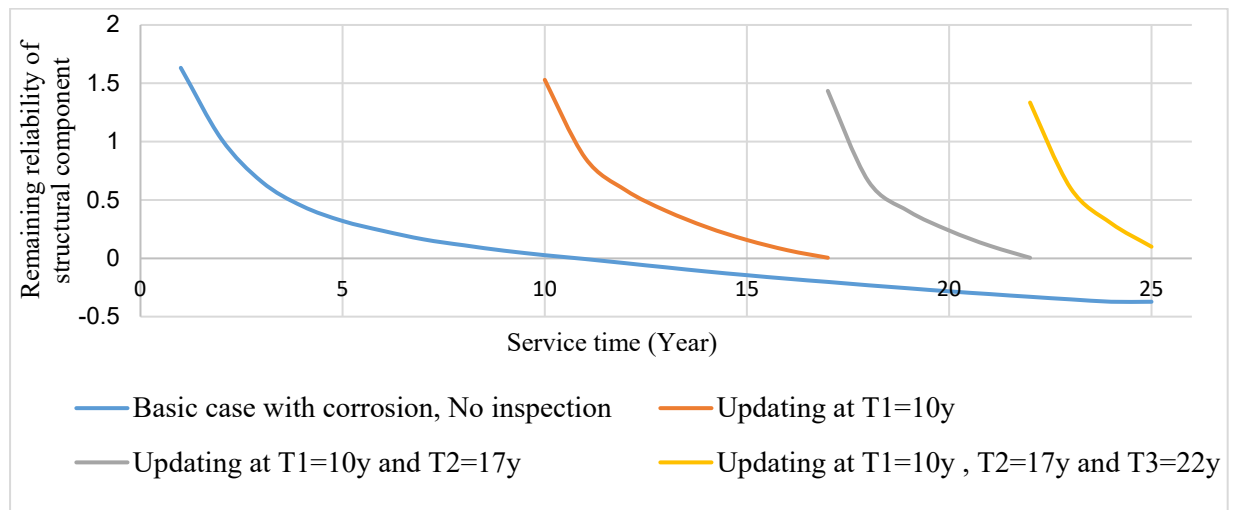

**Figure S30.** Effect of inspection updating on remaining reliability of tubular element ( $R_{rem}$ ) over service time (T) for the submerged zone (Element 67).

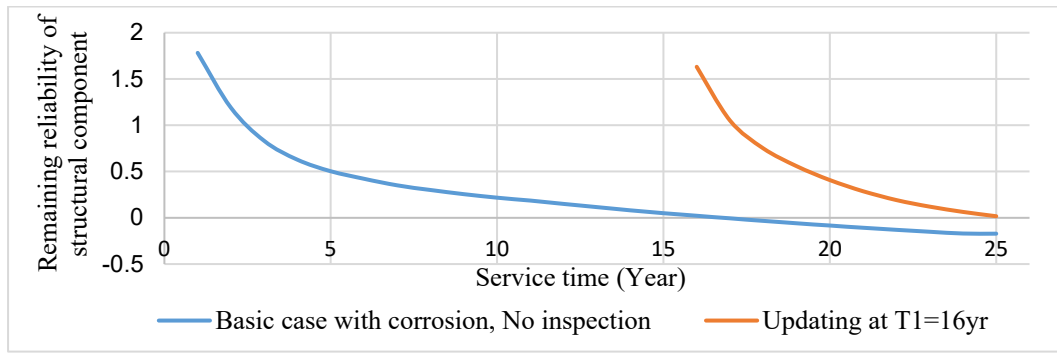

**Figure S31.** Effect of inspection updating on remaining reliability of tubular element ( $R_{rem}$ ) over service time (T) for the submerged zone (Element 21).

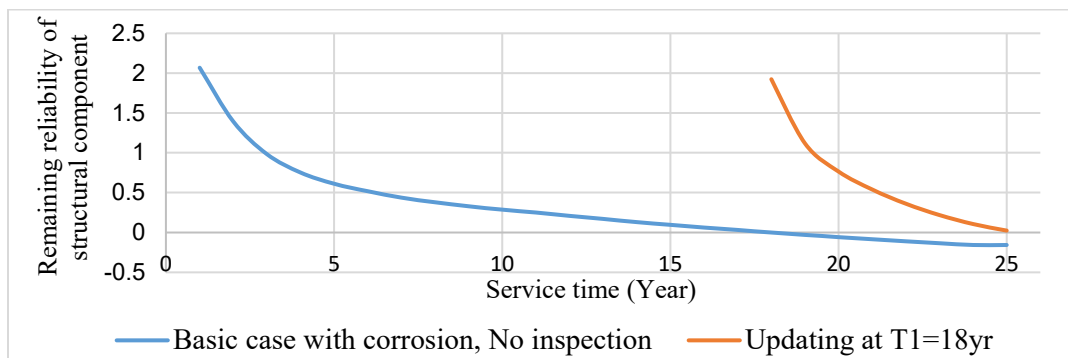

**Figure S32.** Effect of inspection updating on remaining reliability of tubular element ( $R_{rem}$ ) over service time (T) for the submerged zone (Element 35).

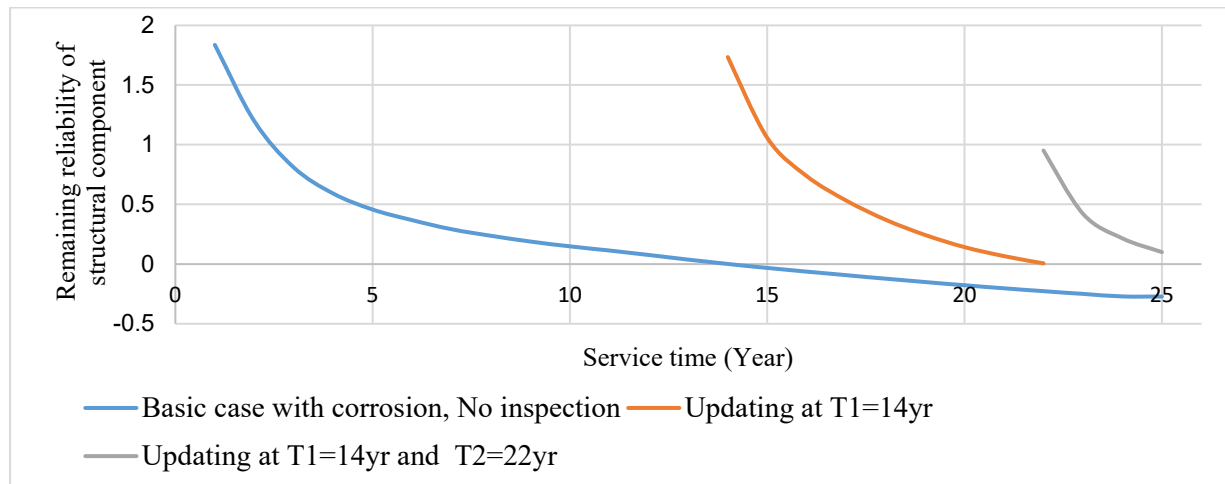

**Figure S33.** Effect of inspection updating on remaining reliability of tubular element ( $R_{rem}$ ) over service time (T) for the submerged zone (Element 52).

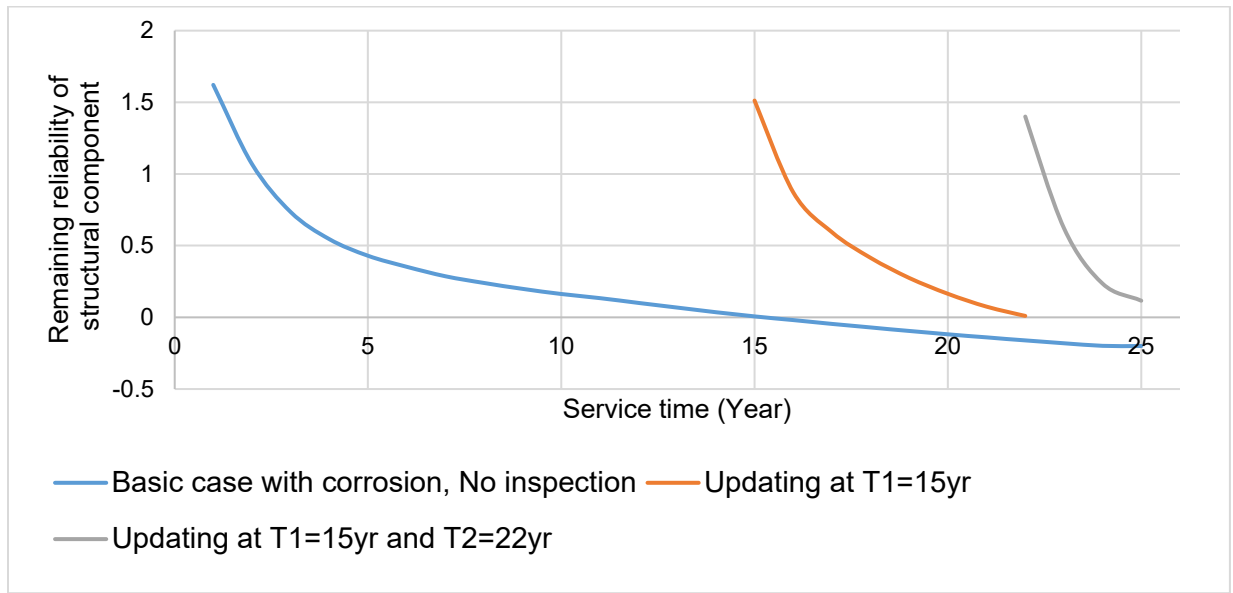

**Figure S34.** Effect of inspection updating on remaining reliability of tubular element ( $R_{rem}$ ) over service time (T) for the submerged zone (Element 74).

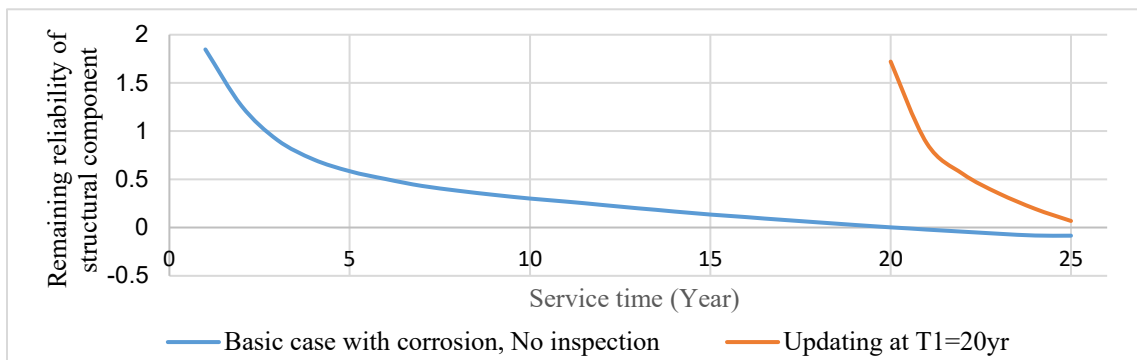

**Figure S35.** Effect of inspection updating on remaining reliability of tubular element ( $R_{rem}$ ) over service time (T) for the submerged zone (Element 18); ROW-2.

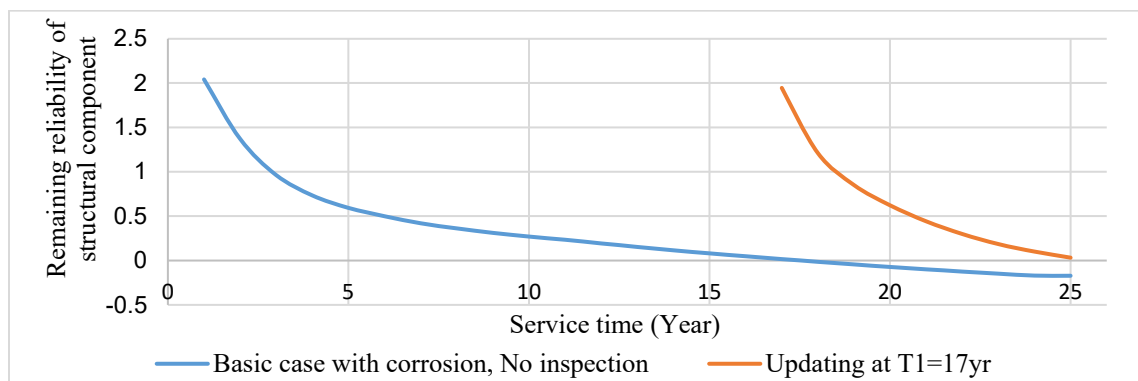

**Figure S36.** Effect of inspection updating on remaining reliability of tubular element ( $R_{rem}$ ) over service time (T) for the submerged zone (Element 26); ROW-2.

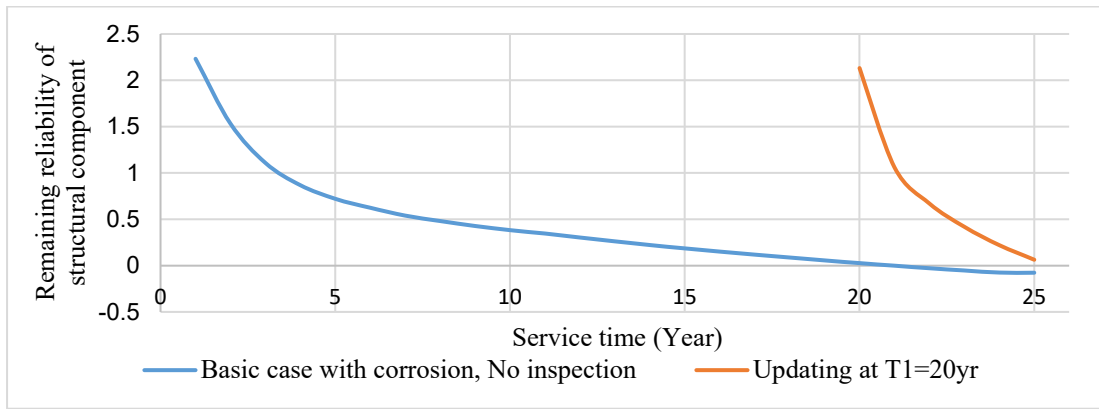

**Figure S37.** Effect of inspection updating on remaining reliability of tubular element ( $R_{rem}$ ) over service time (T) for the submerged zone (Element 32); ROW-2.

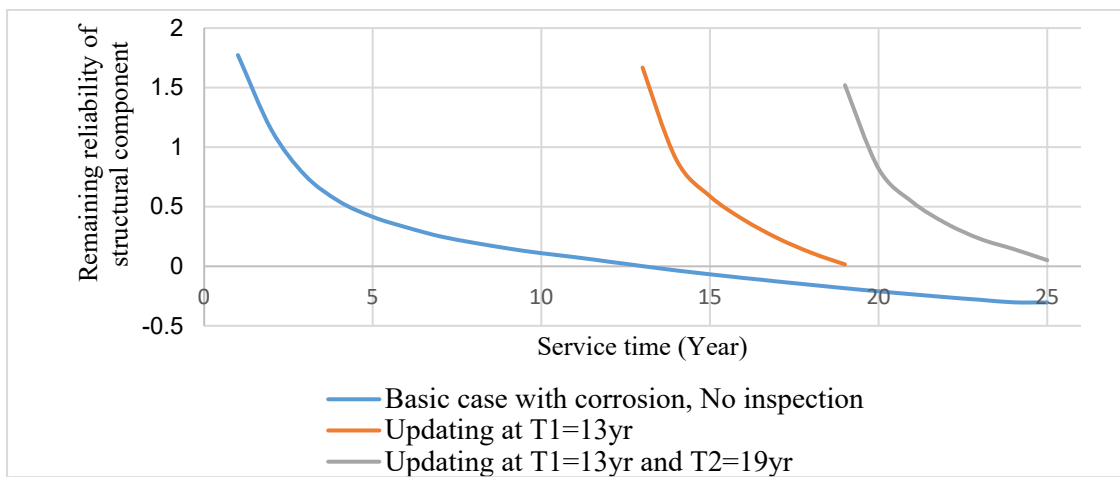

**Figure S38.** Effect of inspection updating on remaining reliability of tubular element ( $R_{rem}$ ) over service time (T) for the submerged zone (Element 33); ROW-2.

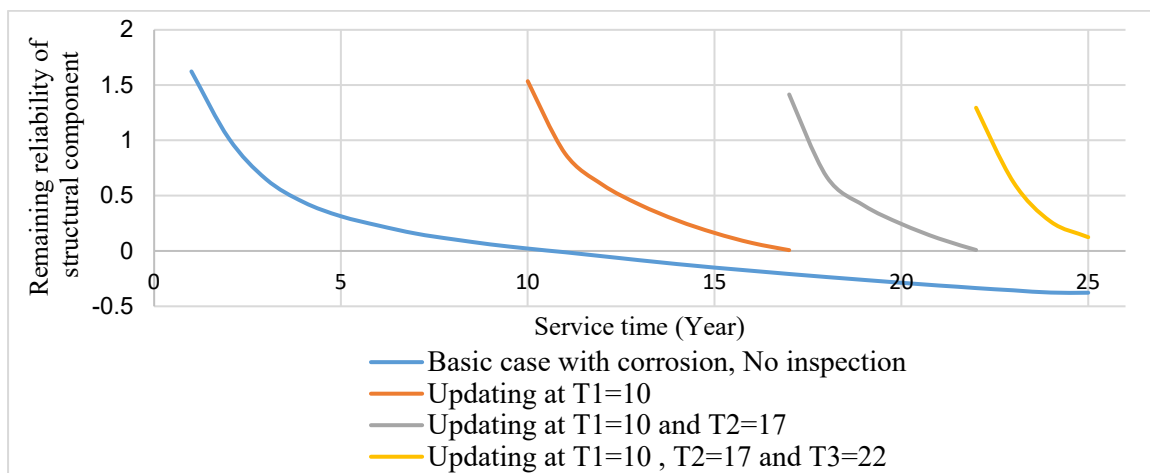

**Figure S39.** Effect of inspection updating on remaining reliability of tubular element ( $R_{rem}$ ) over service time (T) for the submerged zone (Element 50); ROW-B.

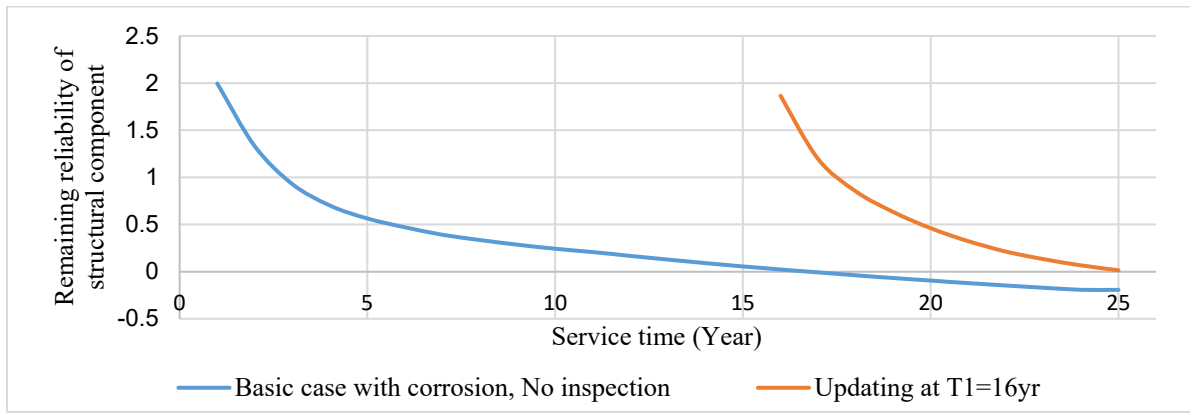

**Figure S40.** Effect of inspection updating on remaining reliability of tubular element ( $R_{rem}$ ) over service time (T) for the submerged zone (Element 53); ROW-B.

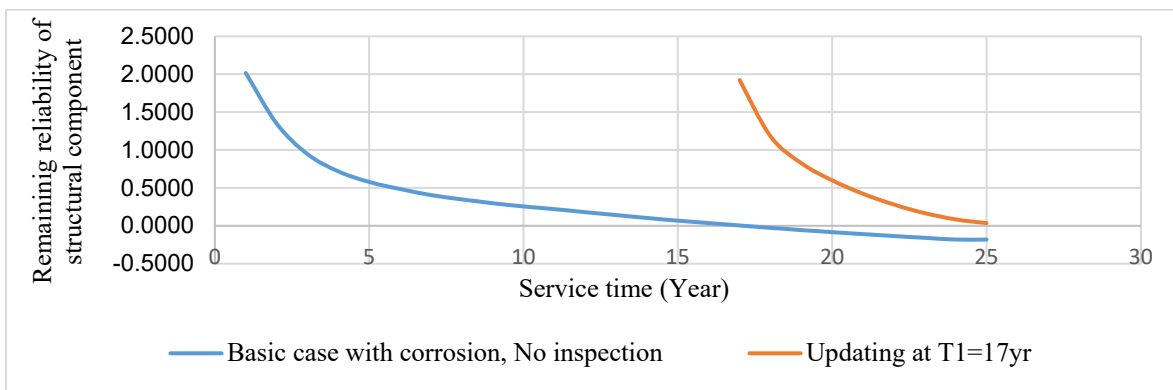

**Figure S41.** Effect of inspection updating on remaining reliability of tubular element ( $R_{rem}$ ) over service time (T) for the submerged zone (Element 71); ROW-1.

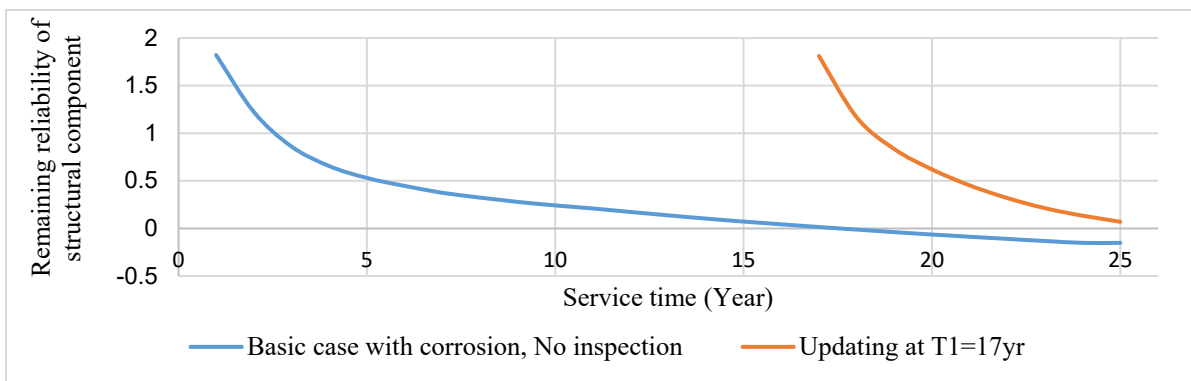

**Figure S42.** Effect of inspection updating on remaining reliability of tubular element ( $R_{rem}$ ) over service time (T) for the submerged zone (Element 75); ROW-1.

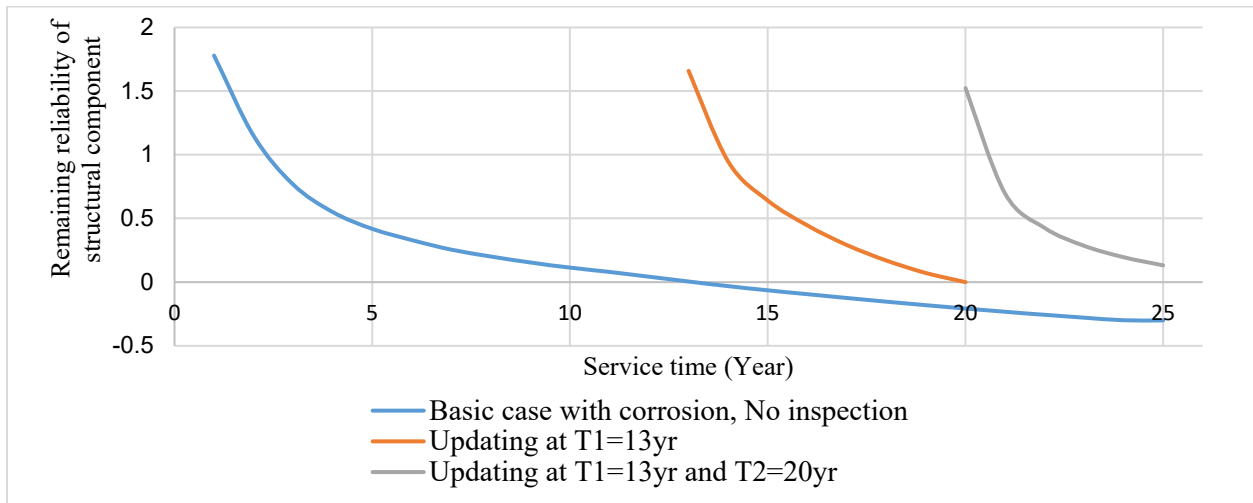

**Figure S43.** Effect of inspection updating on remaining reliability of tubular element ( $R_{rem}$ ) over service time (T) for the submerged zone (Element 76); ROW-1.

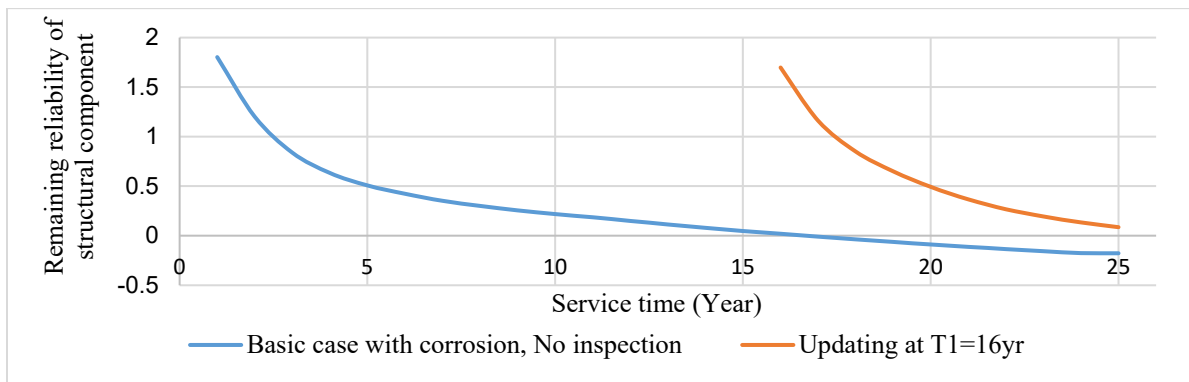

**Figure S44.** Effect of inspection updating on remaining reliability of tubular element ( $R_{rem}$ ) over service time (T) for the submerged zone (Element 77); ROW-1.

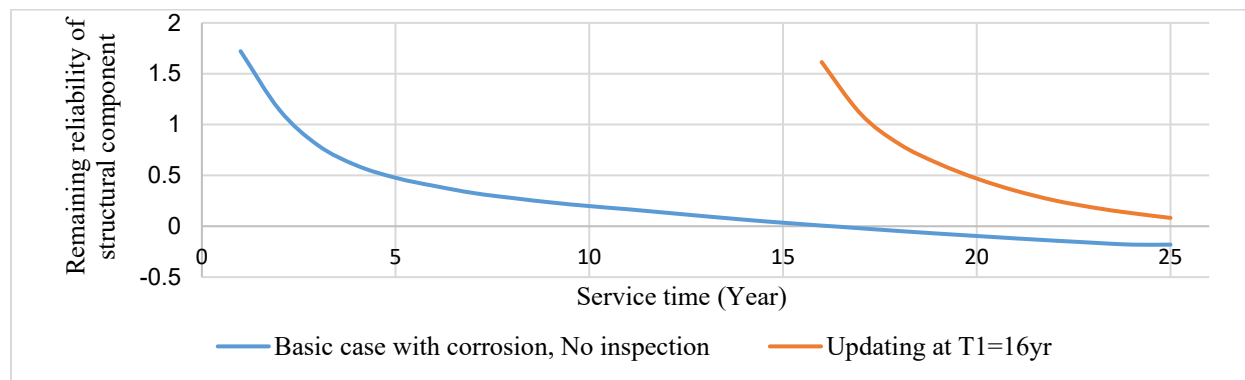

**Figure S45.** Effect of inspection updating on remaining reliability of tubular element ( $R_{rem}$ ) over service time (T) for the submerged zone (Element 91); ROW-A.

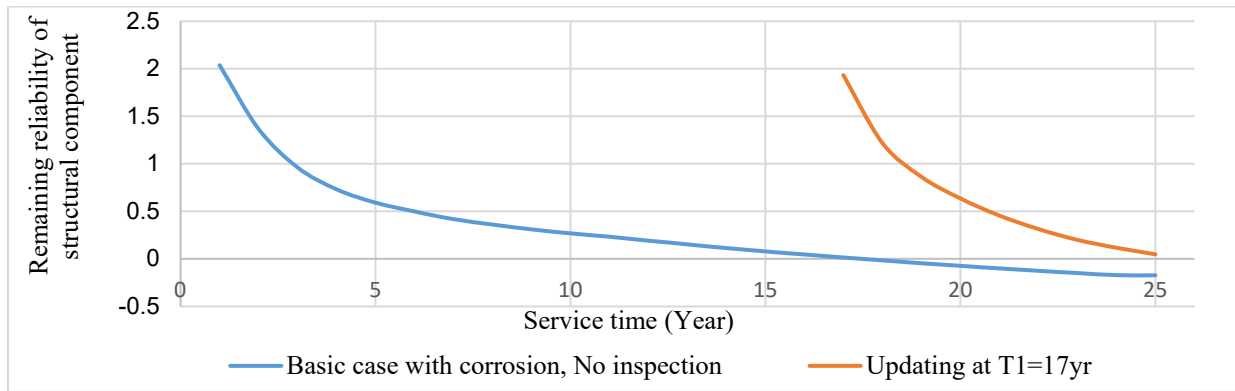

**Figure S46.** Effect of inspection updating on remaining reliability of tubular element ( $R_{rem}$ ) over service time (T) for the submerged zone (Element 92); ROW-A.

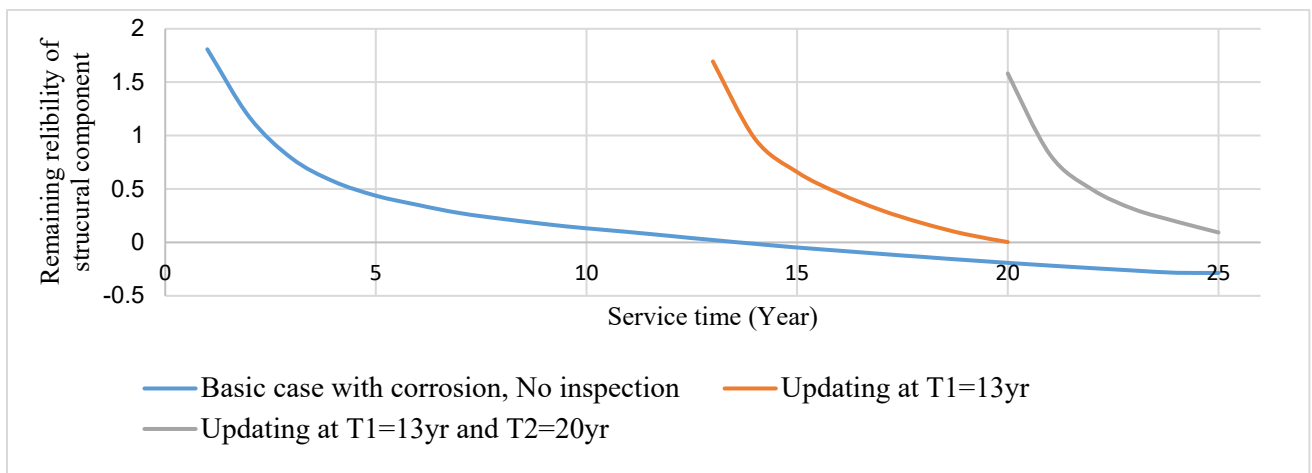

**Figure S47.** Effect of inspection updating on remaining reliability of tubular element ( $R_{rem}$ ) over service time (T) for the submerged zone (Element 93); ROW-A.

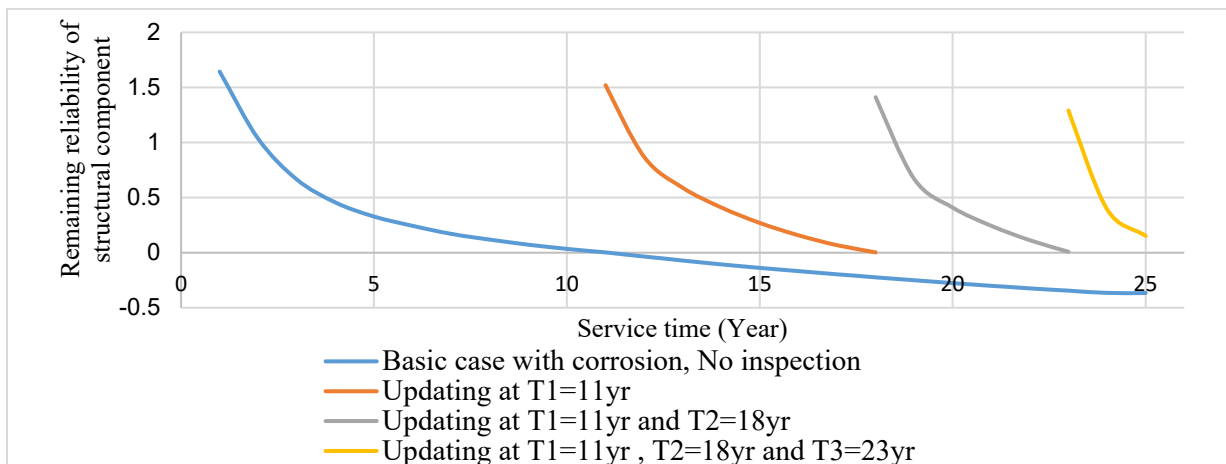

**Figure S48.** Effect of inspection updating on remaining reliability of tubular element ( $R_{rem}$ ) over service time (T) for the submerged zone (Element 95); ROW-A.
